# Supplementary material for: A reversible photochromic covalent organic framework
Source: PubMed Central journal article supplement — Nat Commun. 2024 Oct 1;15:8484. doi: 10.1038/s41467-024-52788-3 (PMC11448497; doi:10.1038/s41467-024-52788-3), 2024-10-01
Supplement: 41467_2024_52788_MOESM3_ESM.pdf [file 41467_2024_52788_MOESM3_ESM.pdf]

## Description of Additional Supplementary Files

**Supplementary Movie 1:** DBTB-DETH-COF exhibits photochromic transformation from yellow to olive under irradiation with visible-light under xenon lamp (300W with the intensities  $2.5\text{ W cm}^{-2}$  ) for 5 minutes.

**Supplementary Movie 2:** The sample AP-DBTB-DETH-COF is heated on a heating plate at  $100\text{ }^{\circ}\text{C}$  for 5 minutes. The olive 10 sample restore to yellow.
